# Supplementary material for: Mechanistic Insights into Elastin Degradation by Pseudolysin, the Major Virulence Factor of the Opportunistic Pathogen Pseudomonas aeruginosa
Source: PubMed Central journal article supplement (PMC4407726; doi:10.1038/srep09936), 2015-04-23
Supplement: srep09936-s1.pdf [file srep09936-s1.pdf]

**Mechanistic Insights into Elastin Degradation by Pseudolysin, the Major Virulence Factor of the Opportunistic Pathogen *Pseudomonas aeruginosa***

Supplementary Data

Jie Yang<sup>1,2</sup>, Hui-Lin Zhao<sup>1,2,#</sup>, Li-Yuan Ran<sup>1,2</sup>, Chun-Yang Li<sup>1,2</sup>, Xi-Ying Zhang<sup>1,2</sup>, Hai-Nan Su<sup>1,2</sup>, Mei Shi<sup>1,2</sup>, Bai-Cheng Zhou<sup>2</sup>, Xiu-Lan Chen<sup>1,2,3,\*</sup>, Yu-Zhong Zhang<sup>1,2,3</sup>

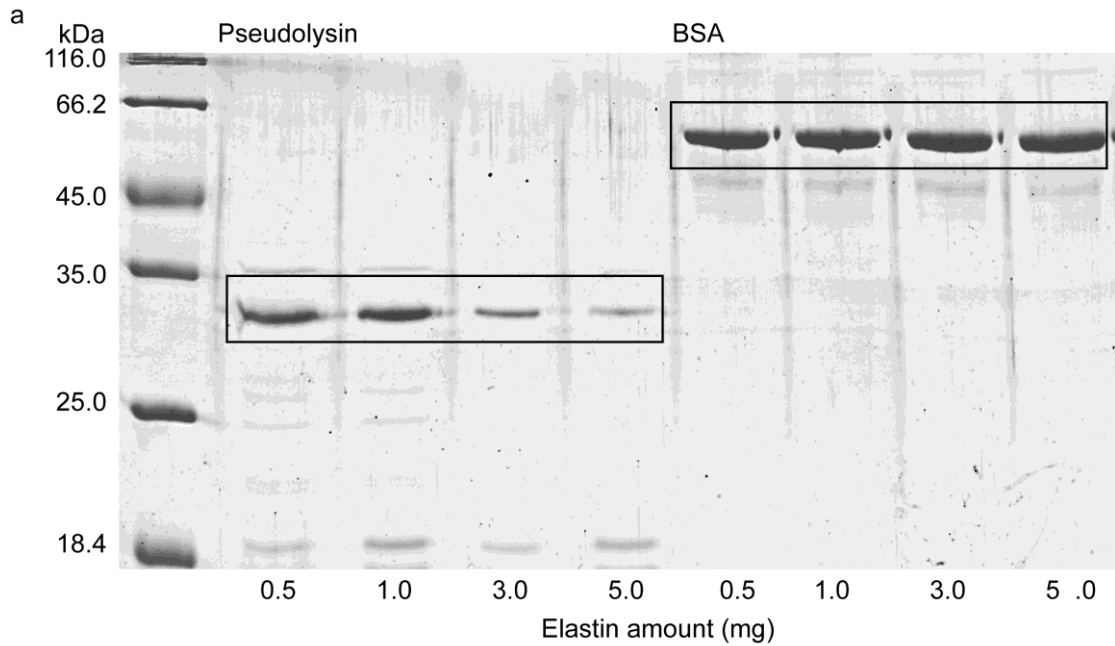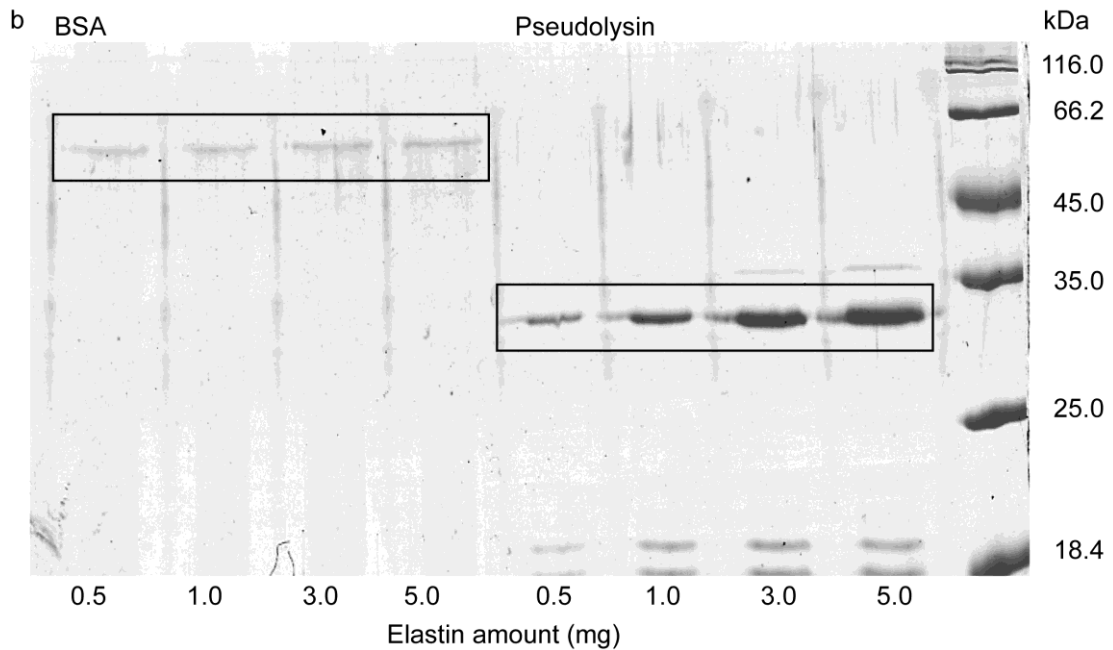

**Supplementary Figure S1** | SDS-PAGE analysis of the binding ability of pseudolysin to insoluble elastin. BSA was used as a negative control. The unbound (a) and bound (b) fractions were analyzed by 15% SDS-PAGE. For protein staining, the gels were stained with 1.0% (wt/vol) Coomassie brilliant blue R-250. (Full-length gels of Figure 1a).

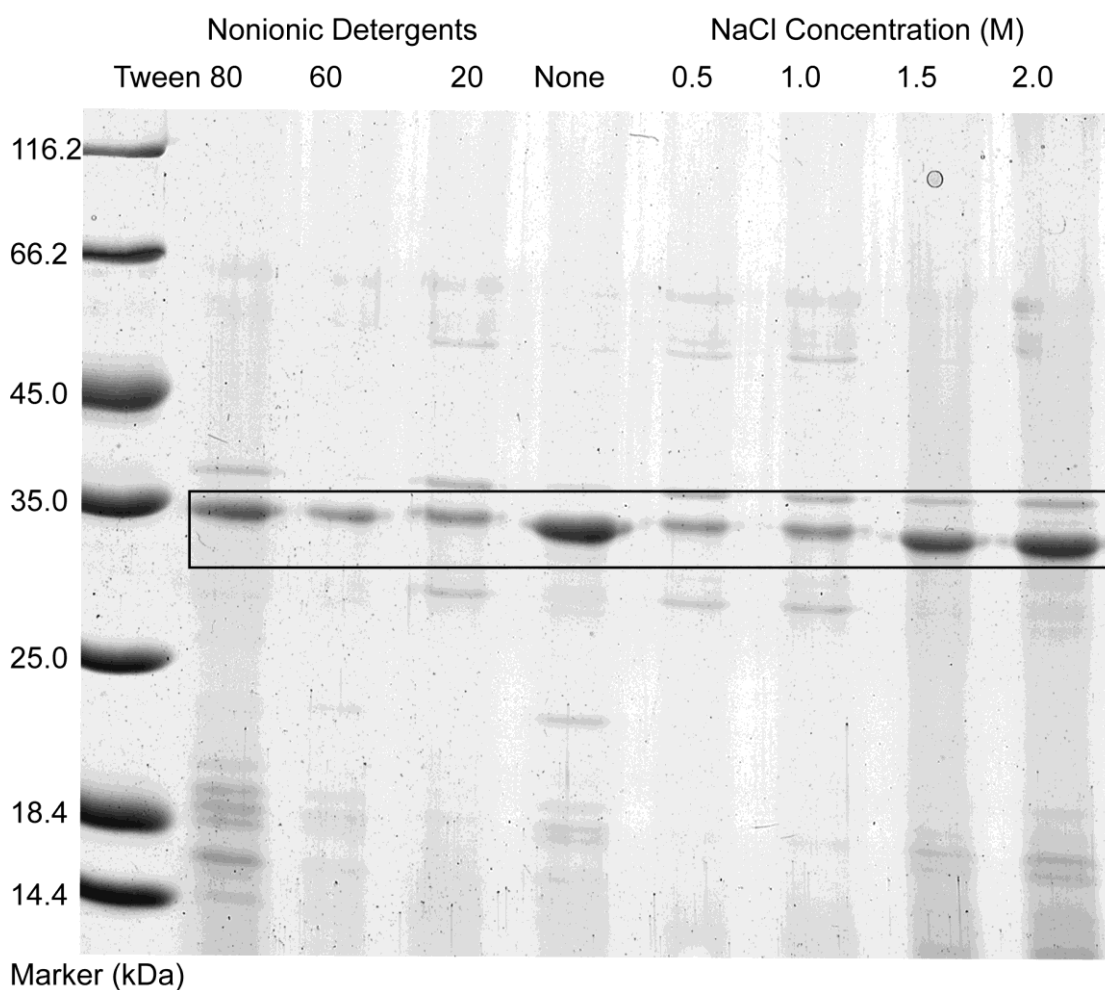

**Supplementary Figure S2** | Effects of nonionic detergents and NaCl on the binding of pseudolysin to insoluble elastin. The samples were analyzed by 15% SDS-PAGE. For protein staining, the gels were stained with 1.0% (wt/vol) Coomassie brilliant blue R-250. (Full-length gel of Figure 1b).

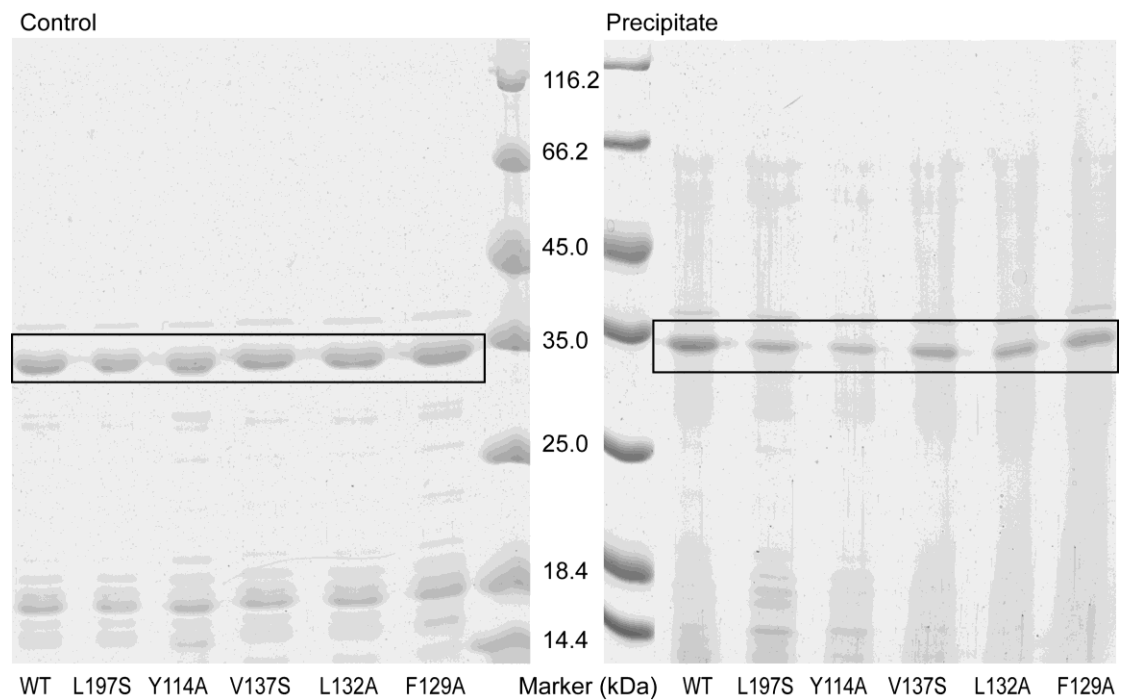

**Supplementary Figure S3** | SDS-PAGE analysis of the binding ability of pseudolysin and its mutants to insoluble elastin. The samples were analyzed by 15% SDS-PAGE. For protein staining, the gels were stained with 1.0% (wt/vol) Coomassie brilliant blue R-250. ‘Control’ represents the proteins mixed with insoluble elastin in the experiment, and ‘Precipitate’ refers to the pseudolysin released from the precipitated elastin. (Full-length gel of Figure 6b).

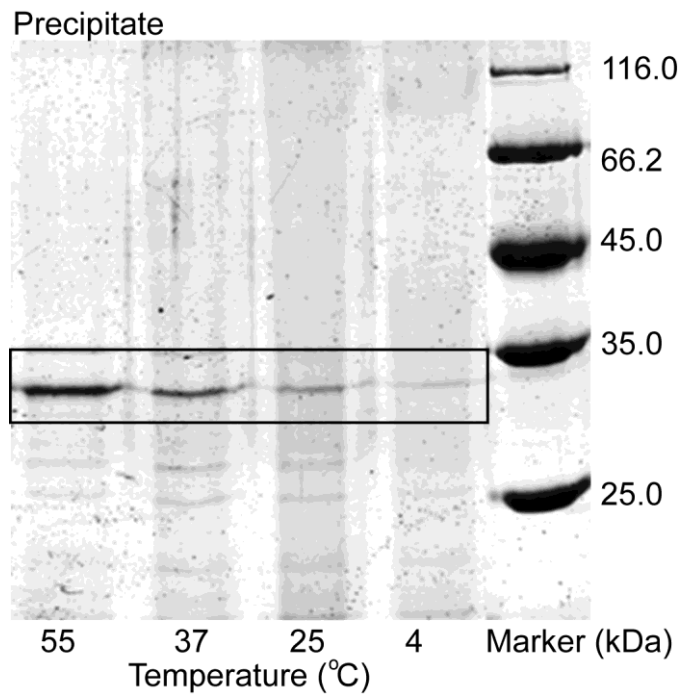

**Supplementary Figure S4** | SDS-PAGE analysis of the binding ability of pseudolysin to insoluble elastin under different temperatures. The bound fractions were analyzed by 15% SDS-PAGE followed by Coomassie blue staining. ‘Precipitate’ refers to the pseudolysin released from the precipitated elastin.

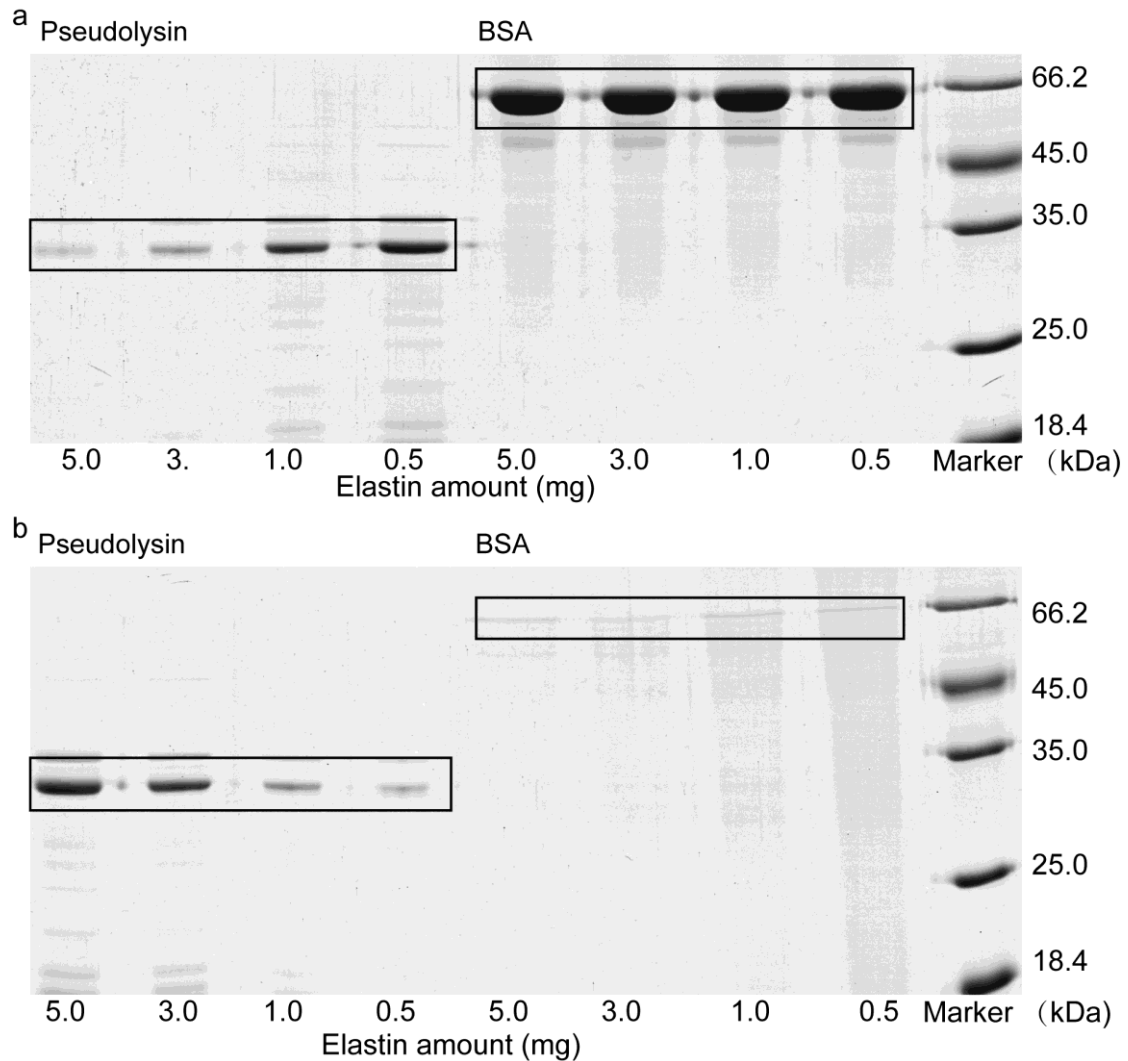

**Supplementary Figure S5** | SDS-PAGE analysis of the binding ability of pseudolysin to insoluble elastin at 37 °C. BSA was used as a negative control. The unbound (a) and bound (b) fractions were analyzed by 15% SDS-PAGE. For protein staining, the gels were stained with 1.0% (wt/vol) Coomassie brilliant blue R-250.

**Supplementary Table S1** | The determined molecular masses and sequences of the 75 peptides released from bovine elastin fibers by pseudolysin.

| Number | MH <sup>+</sup><br>Observed<br>(Da) | Mr (expt)<br>(Da) | Peptide <sup>a</sup> | Position |
|--------|-------------------------------------|-------------------|----------------------|----------|
| 1      | 710.38                              | 709.38            | (G)GVPGAVPGG(V)      | 28 - 36  |
| 2      | 639.34                              | 638.34            | (A)VPGGVPGG(V)       | 33 - 40  |
| 3      | 1129.58                             | 1128.57           | (A)VPGGVPGGVFFP(G)   | 33 - 44  |



|    |         |         |                                     |           |
|----|---------|---------|-------------------------------------|-----------|
| 45 | 1233.69 | 2465.36 | (G)VGVPGVGVPGVGVPGVGVPGALSPAATAK(A) | 372 - 400 |
| 46 | 829.44  | 1656.86 | (V)GVPGVGVPGVGVPGALSPAA(T)          | 378 - 397 |
| 47 | 1106.60 | 1105.59 | (V)GVPGVGVPGALSP(A)                 | 383 - 395 |
| 48 | 511.31  | 1020.61 | (V)PGVGVPGALSPA(A)                  | 385 - 396 |
| 49 | 547.28  | 546.27  | (T)FGLGPG(G)                        | 422 - 427 |
| 50 | 729.38  | 728.37  | (A)KIGAGGVGA(L)                     | 448 - 456 |
| 51 | 485.24  | 484.23  | (L)GGVVPG(A)                        | 458 - 463 |
| 52 | 497.25  | 496.25  | (V)VPGAPG(A)                        | 461 - 466 |
| 53 | 538.81  | 1075.60 | (L)PGVGGVPGVGVIPA(A)                | 472 - 484 |
| 54 | 618.31  | 617.31  | (A)QFGLGP(G)                        | 496 - 501 |
| 55 | 754.45  | 753.44  | (G)VGVAPGVGV(V)                     | 503 - 511 |
| 56 | 780.41  | 779.41  | (V)VPGVGVVPG(V)                     | 512 - 520 |
| 57 | 780.45  | 779.44  | (G)VAPGIGLGP(G)                     | 523 - 531 |
| 58 | 795.43  | 794.42  | (V)APGIGLPGG(V)                     | 524 - 533 |
| 59 | 610.34  | 609.34  | (A)PGIGLGP(G)                       | 525 - 531 |
| 60 | 402.31  | 401.30  | (R)AAAGL(P)                         | 557 - 561 |
| 61 | 655.37  | 654.36  | (A)GVPGLGVG(A)                      | 564 - 571 |
| 62 | 1013.58 | 2025.14 | (V)GAGVPGLGVGAGVPGLGVGAGVPGPG(A)    | 571 - 596 |
| 63 | 1008.63 | 1007.62 | (P)GLGVGAGVPGPGA(V)                 | 585 - 597 |
| 64 | 402.22  | 1203.64 | (P)GLGVGAGVPGPGAVP(G)               | 585 - 599 |
| 65 | 710.41  | 709.40  | (G)VGAGVPGPG(A)                     | 588 - 596 |
| 66 | 426.23  | 425.22  | (G)VPGPG(A)                         | 592 - 596 |
| 67 | 661.33  | 660.32  | (K)FGPGGVGA(L)                      | 610 - 617 |
| 68 | 1006.55 | 2011.08 | (P)GAVGLGGVSPAAAAKAAKFGAAGL(G)      | 671 - 694 |
| 69 | 649.32  | 648.31  | (K)FGAAGLGG(V)                      | 689 - 696 |
| 70 | 677.86  | 1353.70 | (G)VLGAGQPPIGGGAGG(L)               | 697 - 712 |
| 71 | 786.40  | 785.40  | (V)LGAGQPPI(I)                      | 698 - 705 |
| 72 | 490.26  | 489.25  | (P)FPIGG(G)                         | 704 - 708 |
| 73 | 547.31  | 546.30  | (P)FPIGG(A)                         | 704 - 709 |
| 74 | 402.21  | 1203.62 | (F)GGALGALGFPGGAC(L)                | 724 - 737 |
| 75 | 618.32  | 617.31  | (L)GALGFPG(G)                       | 728 - 734 |

<sup>a</sup> The sequence of each peptide was determined by liquid chromatography-mass spectrometry and MASCOT MS/MS Ion Research tools. The left bracketed residue of each peptide indicates the P1-site residue of the left cleavage site. The right bracketed residue of each peptide indicates the P1'-site residue of the right cleavage site.
